# Supplementary material for: Economic inequality in malnutrition: a global systematic review and meta-analysis
Source: HighWire-hosted journal article supplement (doi:10.1136/bmjgh-2021-006906), 2021-12-01
Supplement: bmjgh-2021-006906supp001_data_supplement.pdf [file bmjgh-2021-006906supp001_data_supplement.pdf]

## Supplementary material

**Table S1: Medline search strategy**

|    |                                                                                                                                                                                                                                                                                                                                                                                                               |
|----|---------------------------------------------------------------------------------------------------------------------------------------------------------------------------------------------------------------------------------------------------------------------------------------------------------------------------------------------------------------------------------------------------------------|
| 1  | Wealth* or asset* or income* or earning* or poor* or povert* or depriv* or economic status or economic inequality or expenditure or equit* or equal* or inequal* or dispar*                                                                                                                                                                                                                                   |
| 2  | Exp poverty/ or exp health equity/ or exp economic status/ or exp health status disparities/                                                                                                                                                                                                                                                                                                                  |
| 3  | Underweight or overweight or adipos* or BMI or body mass index or (body-mass adj2 ind*) or obes* or weight-for-height or weight-for-length or WHZ or WLZ or stunt* or HAZ or height-for-age or length-for-age or wasting or wasted or an?emi* or h?emoglob* or undernutri* or overnutri* or undermour* or overmour* or malnutri* or malnour* or thinness or overweight* or underweight* or nutritional status |
| 4  | Exp thinness/ or exp overweight/ or exp anemia/ or exp nutrition disorders/ or exp obesity/ or exp body mass index/                                                                                                                                                                                                                                                                                           |
| 5  | (Concentration* adj3 curve*) or (concentration adj3 ind*) or (Lorenz adj3 curve*)                                                                                                                                                                                                                                                                                                                             |
| 6  | (1 or 2) and (3 or 4) and 5                                                                                                                                                                                                                                                                                                                                                                                   |
| 7  | ((Wealth* or income* or earning* or poor* or povert* or economic) adj3 (inequ* or equ* or distribut* or disparit*)) or gini or theil or pietra or schutz or Robin Hood-ind* or atkinson or (decile* adj3 ratio*) or inequality                                                                                                                                                                                |
| 8  | Multilevel or multi-level or (two adj3 level*) or two-level or random effects or random effect or random-effect or random-effects or (control* adj5 individual*) or (mixed adj3 effect*) or mixed-effect or mixed-effects or nested data or random coefficient or random coefficients or (hierarchic* adj3 (model* or data*))                                                                                 |
| 9  | (3 or 4) and 7 and 8                                                                                                                                                                                                                                                                                                                                                                                          |
| 10 | 6 or 9                                                                                                                                                                                                                                                                                                                                                                                                        |

**Table S2: Characteristics of studies included in the meta-analysis of concentration indices**

|                                     | Child stunting, number of estimates (N)<br>=277 |                 | Child wasting, N=60 |                 | Adult overweight /obesity, N=89 |                 |
|-------------------------------------|-------------------------------------------------|-----------------|---------------------|-----------------|---------------------------------|-----------------|
|                                     | Mean or %                                       | (Min, max)      | Mean or %           | (Min, max)      | Mean or %                       | (Min, max)      |
| Survey date, mean year              | 2004                                            | (1974, 2018)    | 2003                | (1987, 2018)    | 2001                            | (1971, 2016)    |
| % estimates measuring income        | 8.3%                                            | ..              | 33.3%               | ..              | 83.1%                           | ..              |
| % estimates measuring wealth        | 91.0%                                           | ..              | 63.3%               | ..              | 16.9%                           | ..              |
| % estimates measuring expenditure   | 0.7%                                            | ..              | 3.3%                | ..              | ..                              | ..              |
| Mean outcome prevalence             | 32.5%                                           | (4.0%, 61.0%)   | 10.1%               | (1.0%, 25.0%)   | 22.1%                           | (4.4%, 88.2%)   |
| Mean concentration index            | -0.164                                          | (-0.441, 0.027) | -0.038              | (-0.174, 0.018) | -0.012                          | (-0.280, 0.339) |
| WHO universal health coverage index | 54.8                                            | (22, 78)        | 51.6                | (35, 78)        | 78.2                            | (46, 88)        |
| FAO Food security index             | 108.1                                           | (25, 155)       | 108.6               | (82, 141)       | 133.9                           | (102, 149)      |
| Low-income country, %               | 53.6%                                           | ..              | 56.7%               | ..              | 5.6%                            | ..              |
| Region, %                           | ..                                              | ..              | ..                  | ..              | ..                              | ..              |
| East Asia & Pacific                 | 6.1%                                            | ..              | 6.7%                | ..              | 5.6%                            | ..              |
| Europe & Central Asia               | 10.8%                                           | ..              | 3.3%                | ..              | 49.4%                           | ..              |
| Latin America & Caribbean           | 21.3%                                           | ..              | 11.7%               | ..              | 4.5%                            | ..              |
| Middle East & North Africa          | 5.4%                                            | ..              | 5%                  | ..              | 0%                              | ..              |
| South Asia                          | 8.7%                                            | ..              | 23.3%               | ..              | 5.6%                            | ..              |
| Sub-Saharan Africa                  | 46.7%                                           | ..              | 50.0%               | ..              | 5.6%                            | ..              |
| North America                       | 0%                                              | ..              | 0%                  | ..              | 29.2%                           | ..              |
| Gender composition of sample        | ..                                              | ..              | ..                  | ..              | ..                              | ..              |
| Mixed                               | 100%                                            | ..              | 100%                | ..              | 30.3%                           | ..              |
| Male only                           | 0%                                              | ..              | 0%                  | ..              | 31.5%                           | ..              |
| Female only                         | 0%                                              | ..              | 0%                  | ..              | 38.2%                           | ..              |
| Risk of bias                        |                                                 |                 |                     |                 |                                 |                 |
| Low                                 | 0%                                              |                 | 0%                  |                 | 7.9%                            |                 |
| Moderate                            | 91.0%                                           |                 | 91.7%               |                 | 70.8%                           |                 |
| High                                | 8.7%                                            |                 | 6.7%                |                 | 16.9%                           |                 |
| Critical                            | 0.4%                                            |                 | 1.7%                |                 | 4.5%                            |                 |

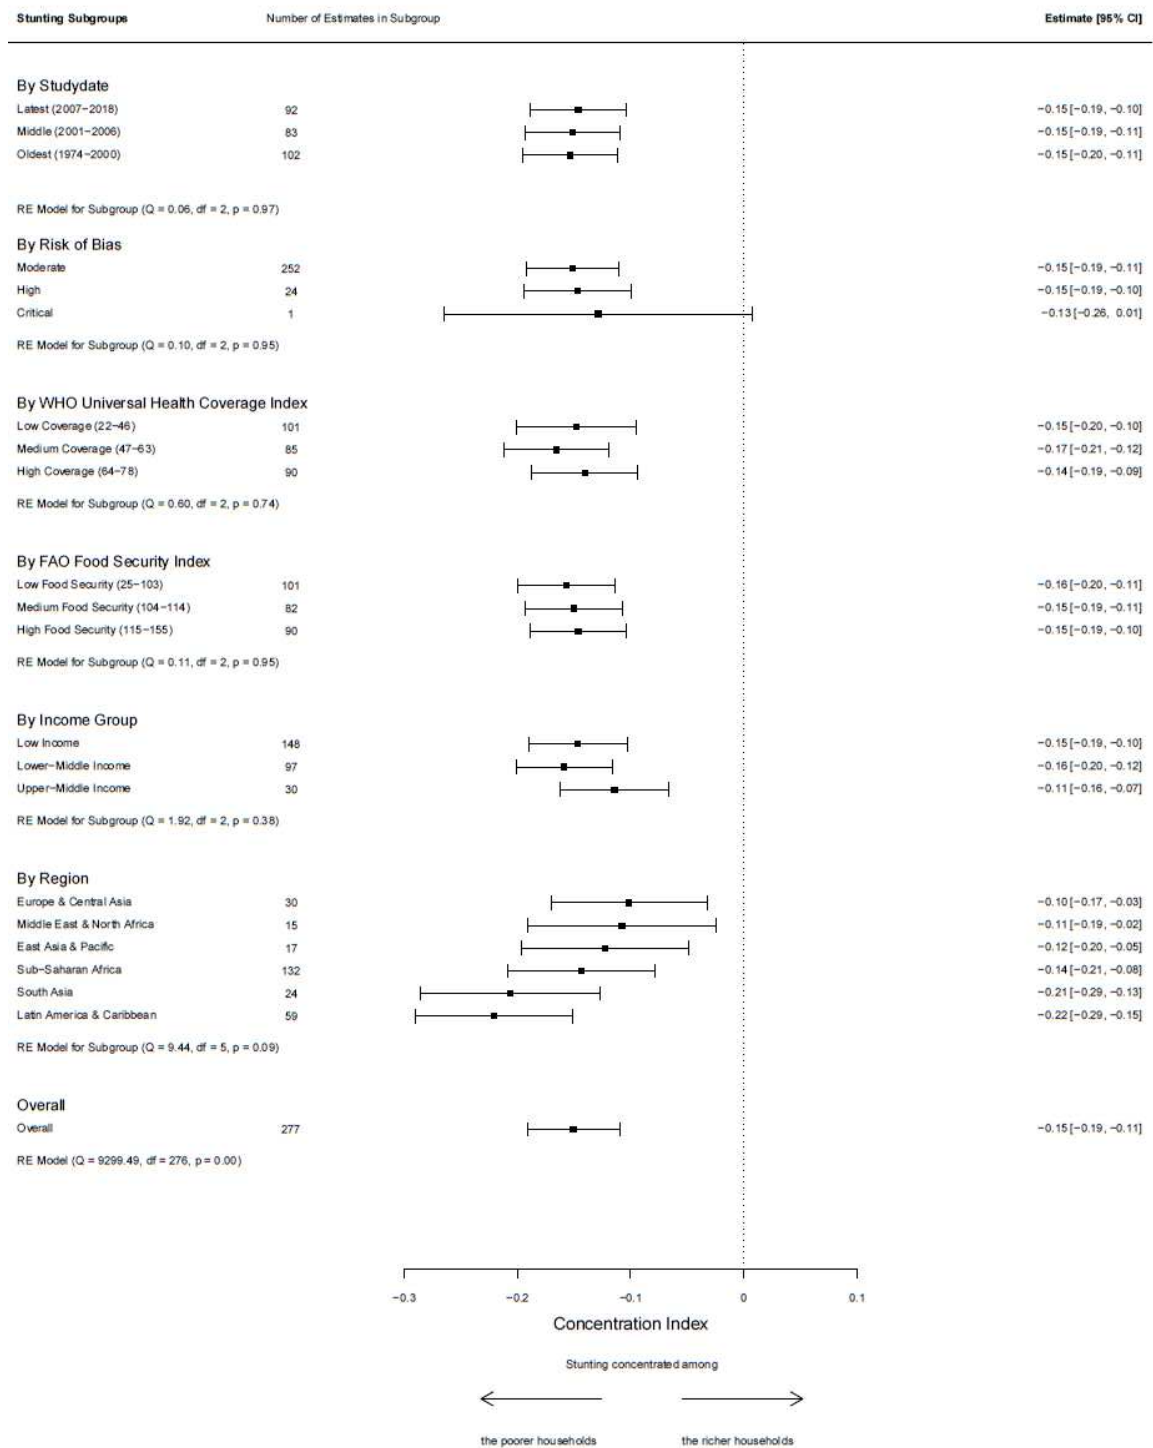

Figure S1: Subgroup analysis for concentration indices of stunting







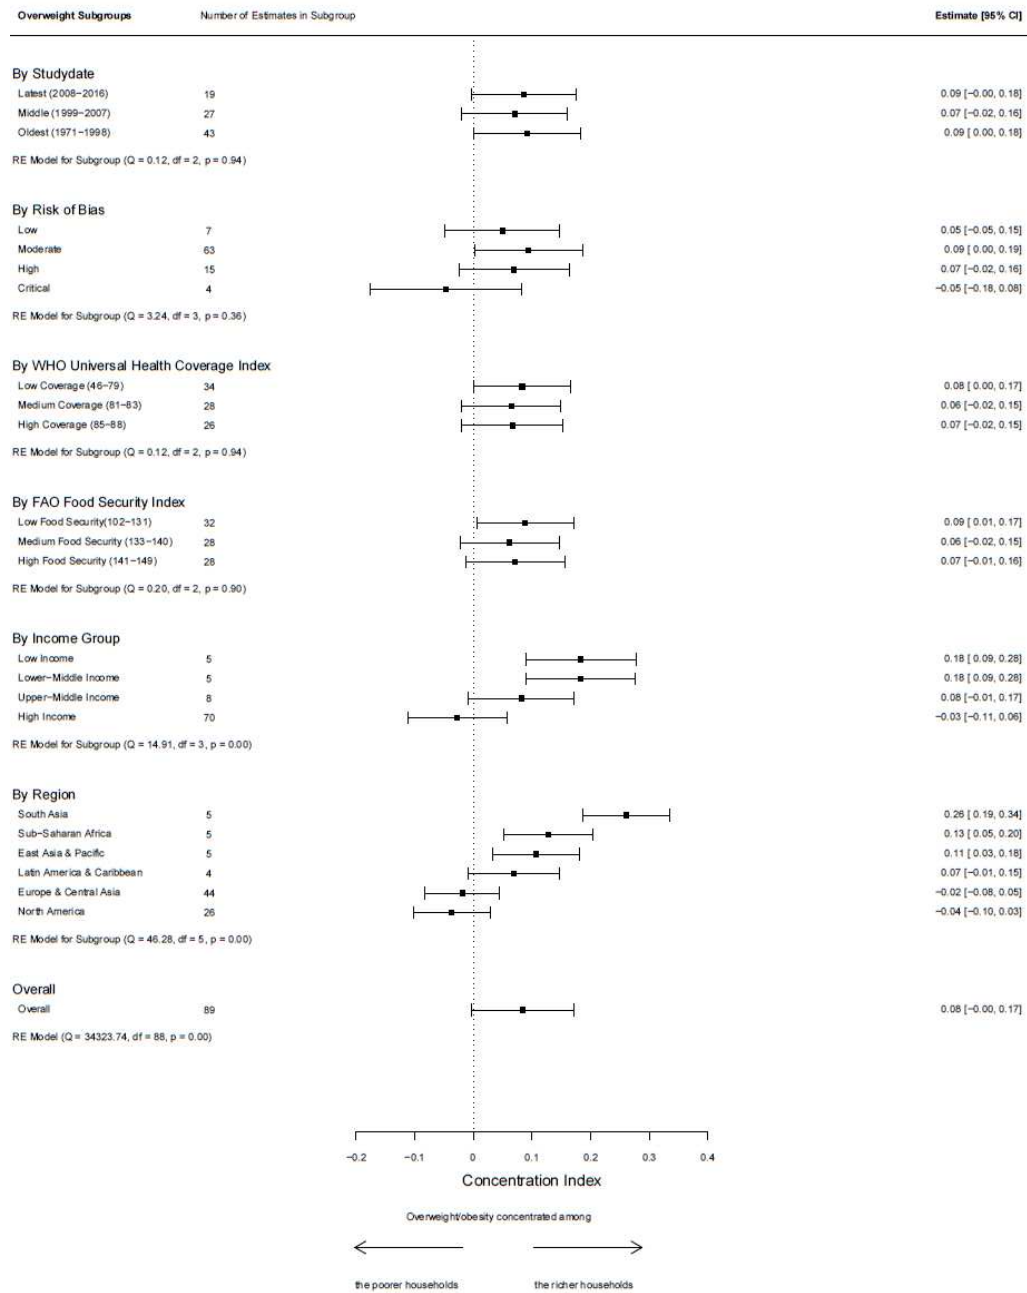

Figure S5: Subgroup analysis for concentration indices of adult overweight/obesity

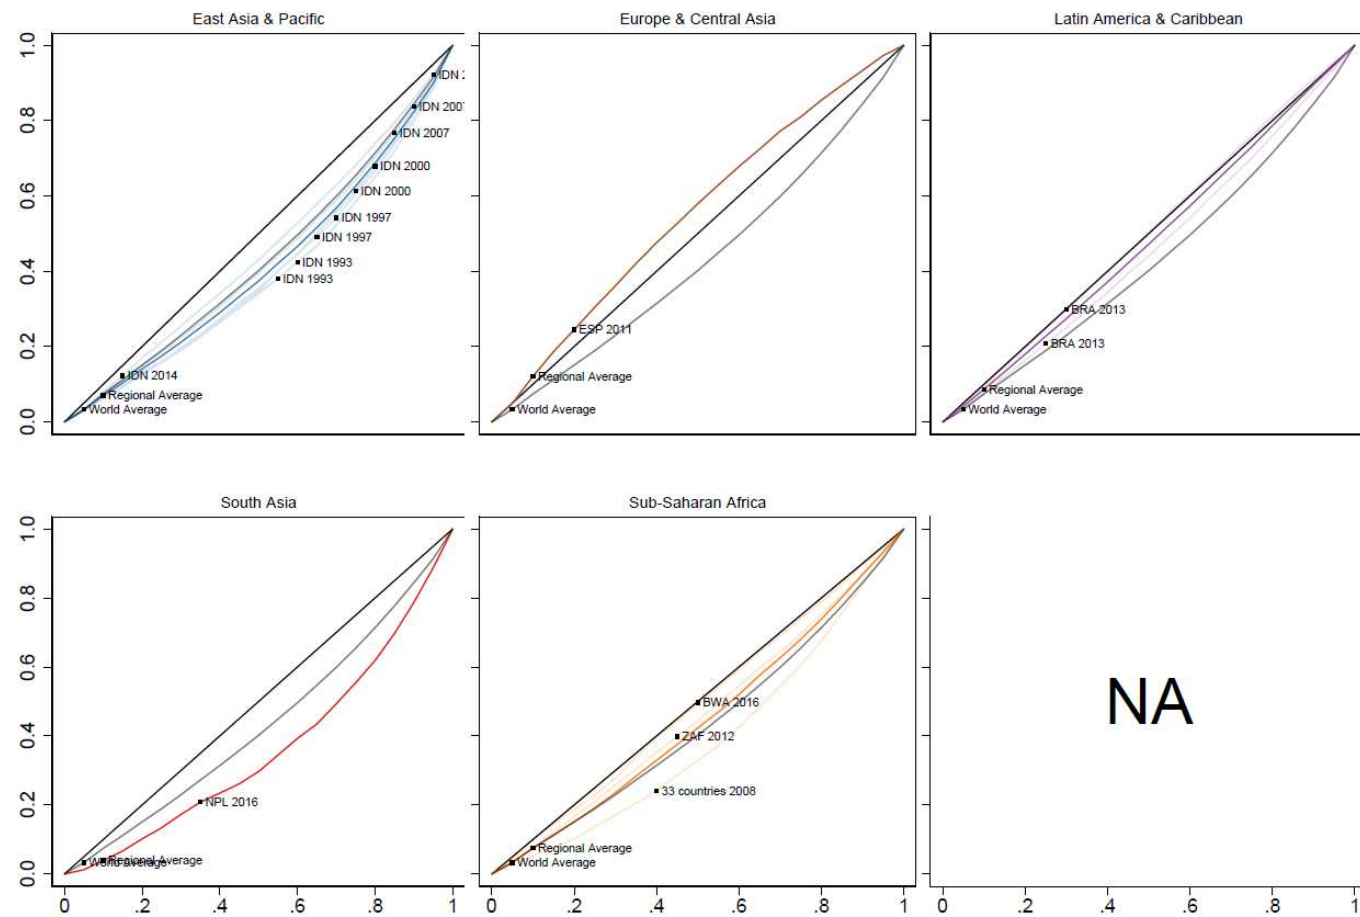

**Figure S6: Regional overweight/obesity concentration curves with country names**

Cumulative proportion of wealth on the X-axis. Cumulative proportion of adult overweight/obesity on the Y-axis. Earliest year of data collection and three-letter ISO country code call-outs.



**Table S3: Eggers test on small-study effects for concentration indices**

|                          | Beta  | SE of Beta | Z     | P    |
|--------------------------|-------|------------|-------|------|
| Child Stunting           | 1.65  | 0.55       | 3.02  | 0.00 |
| Child Wasting            | -0.70 | 0.69       | -1.02 | 0.31 |
| Adult Overweight/Obesity | -1.50 | 0.61       | -2.45 | 0.01 |

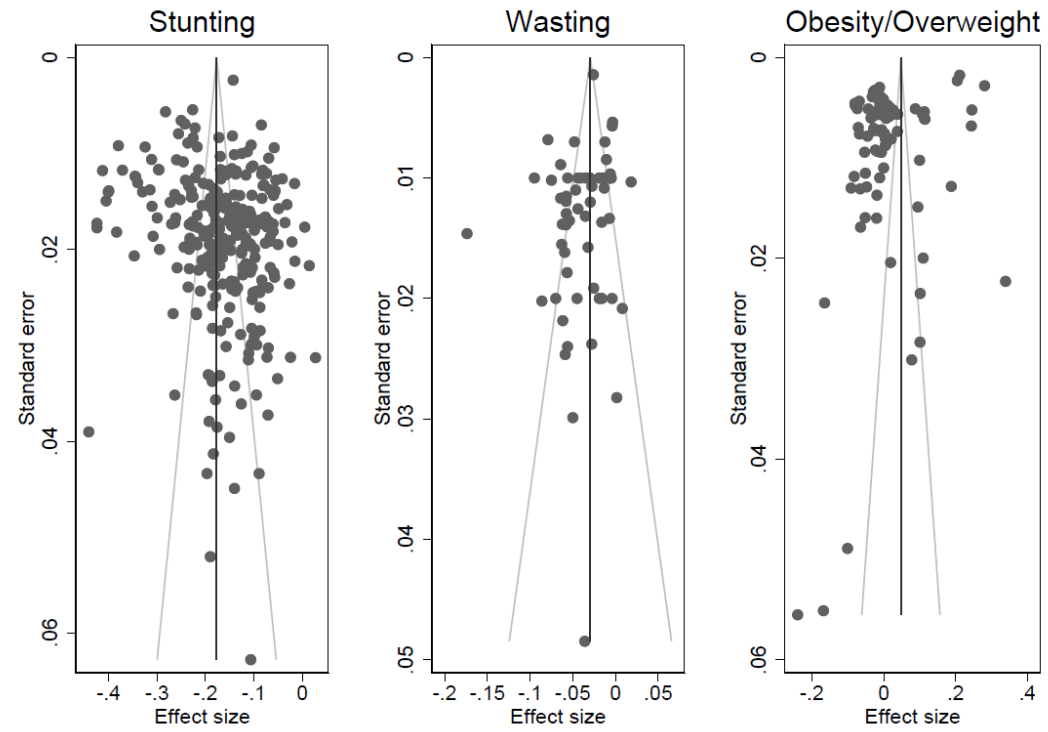

Figure S7: Funnel plots of concentration curves by outcome

**Table S4A: Characteristics of multilevel studies measuring associations between economic inequality and nutrition prevalence**

| Author (publication year)       | Survey years         | Sample age (y) | Country      | Sample size | Economic status measure                              | Outcome prevalence | Area level variable | Risk of Bias |
|---------------------------------|----------------------|----------------|--------------|-------------|------------------------------------------------------|--------------------|---------------------|--------------|
| <b>Child stunting</b>           |                      |                |              |             |                                                      |                    |                     |              |
| Reinbold (2011)*                | 2004                 | <5             | Bangladesh   | 6908        | DHS wealth Index                                     | ..                 | Region and district | Moderate     |
| Reinbold (2011)*                | 2003                 | <5             | Kenya        | 5767        | DHS wealth Index                                     | ..                 | Region and district | Moderate     |
| <b>Child Anaemia</b>            |                      |                |              |             |                                                      |                    |                     |              |
| van Deurzen et al (2014)*       | 2000-2011            | <6             | 30 countries | 152485      | International Wealth Index Asset Score (DHS derived) | 58.7%              | Country             | Moderate     |
| <b>Adult underweight</b>        |                      |                |              |             |                                                      |                    |                     |              |
| Mandal (2007)                   | 1992, 1997, 2002     | <95            | USA          | 448874      | Not specified                                        | ..                 | State               | Moderate     |
| Subramanian et al (2007)        | 1998-1999, 1999-2000 | 15 - 49        | India        | 77220       | Expenditure                                          | 32.1%              | State               | Low          |
| Hanandita and Tampubolon (2015) | 2007                 | ≥15            | Indonesia    | 645032      | Expenditure                                          | 14.4%              | District            | Moderate     |
| <b>Adult overweight/obesity</b> |                      |                |              |             |                                                      |                    |                     |              |
| Bjornstrom (2011)               | 2000-2001            | ..             | USA          | 2875        | Income                                               | 23%                | Neighbourhood       | Moderate     |
| Zhang (2012)                    | 2006                 | ≥18            | China        | 9586        | Income                                               | 26%                | Province            | High         |

| Author (publication year)       | Survey years                                                  | Sample age (y) | Country      | Sample size | Economic status measure | Outcome prevalence | Area level variable           | Risk of Bias |
|---------------------------------|---------------------------------------------------------------|----------------|--------------|-------------|-------------------------|--------------------|-------------------------------|--------------|
| Fan et al (2016)                | 2000, 2003-2008,                                              | 20 - 64        | USA          | 10302       | Income                  | 34.4%              | County and census tract       | Low          |
| Chang and Christakis (2005)     | 1990, 1996-1998,                                              | ≥15            | USA          | 143931      | Income                  | 38.7%              | Metropolitan Statistical Area | Moderate     |
| Haithecoat et al (2019)         | 2014-2016, 2016                                               | ..             | USA          | 954671      | Income                  | 31%                | State                         | Moderate     |
| Chen and Crawford (2012)        | 2000                                                          | ≥18            | USA          | 126298      | Income                  | 18.5%              | State and county              | Moderate     |
| Kim et al (2006)                | 1974-1994, 1975-1998, 1990-1994, 1990, 1996, 1997, 1998, 2000 | ≥18            | USA          | 181200      | Income                  | 19.5%              | State                         | Moderate     |
| Subramanian et al (2007)        | 1998-1999, 1999-2000                                          | 15 - 49        | India        | 77220       | Expenditure             | 6.2%               | State                         | Low          |
| Hanandita and Tampubolon (2015) | 2007                                                          | ≥15            | Indonesia    | 645032      | Expenditure             | 17.9%              | District                      | Moderate     |
| Mandal (2007)                   | 1992, 1997, 2002                                              | <95            | USA          | 448874      | Not specified           | ..                 | State                         | Moderate     |
| <b>Adult (female) Anaemia</b>   |                                                               |                |              |             |                         |                    |                               |              |
| van Deurzen et al (2014)*       | 2000-2011                                                     | 15 - 49        | 33 countries | 373735      | Wealth                  | 40.2%              | Country                       | Moderate     |

\* These studies were not included in the meta-analysis

**Table S4B: Variable adjustment for studies on association between economic inequality and nutrition prevalence**

| Author                          | Adjusted variables in main model                                                                                                                                                                                                       |
|---------------------------------|----------------------------------------------------------------------------------------------------------------------------------------------------------------------------------------------------------------------------------------|
| <b>Child stunting</b>           |                                                                                                                                                                                                                                        |
| Reinbold (2011)                 | Child age, sex, religion, mother's education, mother's employment status, mother's partner's education, mother's partner lives at home, mother's partner's age, mother's partner's age squared, household size, household size squared |
| <b>Child anaemia</b>            |                                                                                                                                                                                                                                        |
| van Deurzen et al (2014)        | Household wealth index quintiles, survey year                                                                                                                                                                                          |
| <b>Adult underweight</b>        |                                                                                                                                                                                                                                        |
| Mandal (2007)                   | Restaurants, food stamp rates, unemployment rate, metro residency, age, education, children, race, marital status, work status, income, smoking, and health insurance.                                                                 |
| Subramanian et al (2007)        | Age, religion, caste, marital status, education, wealth, occupation, urban/rural, parity, smoking, drinking, tobacco chewing, tuberculosis, malaria, and state economic development.                                                   |
| Hanandita and Tampubolon (2015) | Age, gender, marital status, education, employment status, physical activity, household size, per capita expenditure, median per capita expenditure, and deprivation.                                                                  |
| <b>Adult overweight/obesity</b> |                                                                                                                                                                                                                                        |
| Bjornstrom (2011)               | Age, gender, marital status, race, education, log family income, insurance, chronic conditions, smoking, and median household income.                                                                                                  |
| Zhang (2012)                    | Gender, age, marital status, education, work status, occupation, wealth, income, province mean income, province mean education, urban and, province urban                                                                              |
| Fan et al (2016)                | Age, gender, marital status, family size, education, race/ethnicity, birthplace, income, survey year, census tract median income, and county median income.                                                                            |
| Chang and Christakis (2005)     | Age, household income, education, median income, population, and region.                                                                                                                                                               |
| Haithcoat et al (2019)          | Inequality uniformity, median state household income, % insured, % on food assistance, age, gender, ethnicity/race, education, income, marital status, health insurance status, smoking, exercising, and alcohol.                      |
| Chen and Crawford (2012)        | Marital status, age, income, education, employment status, race, poverty rate county, median income county, interaction of county gini: low income, interaction of state gini: low income, and state gini.                             |
| Kim et al (2006)                | Age, gender, race, marital status, educational attainment, household income, state social capital, mean household income, and % black.                                                                                                 |
| Subramanian et al (2007)        | Age, religion, caste, marital status, education, wealth, occupation, urban/rural, parity, smoking, drinking, tobacco chewing, tuberculosis, malaria, and state economic development.                                                   |
| Hanandita and Tampubolon (2015) | Age, gender, marital status, education, employment status, physical activity, household size, per capita expenditure, median per capita expenditure, and deprivation.                                                                  |
| Mandal (2007)                   | Restaurants, food stamp rates, unemployment rate, metro residency, age, education, children, race, marital status, work status, income, smoking, and health insurance.                                                                 |
| <b>Adult (female) anaemia</b>   |                                                                                                                                                                                                                                        |
| van Deurzen et al (2014)        | Household wealth index quintiles, and survey year.                                                                                                                                                                                     |

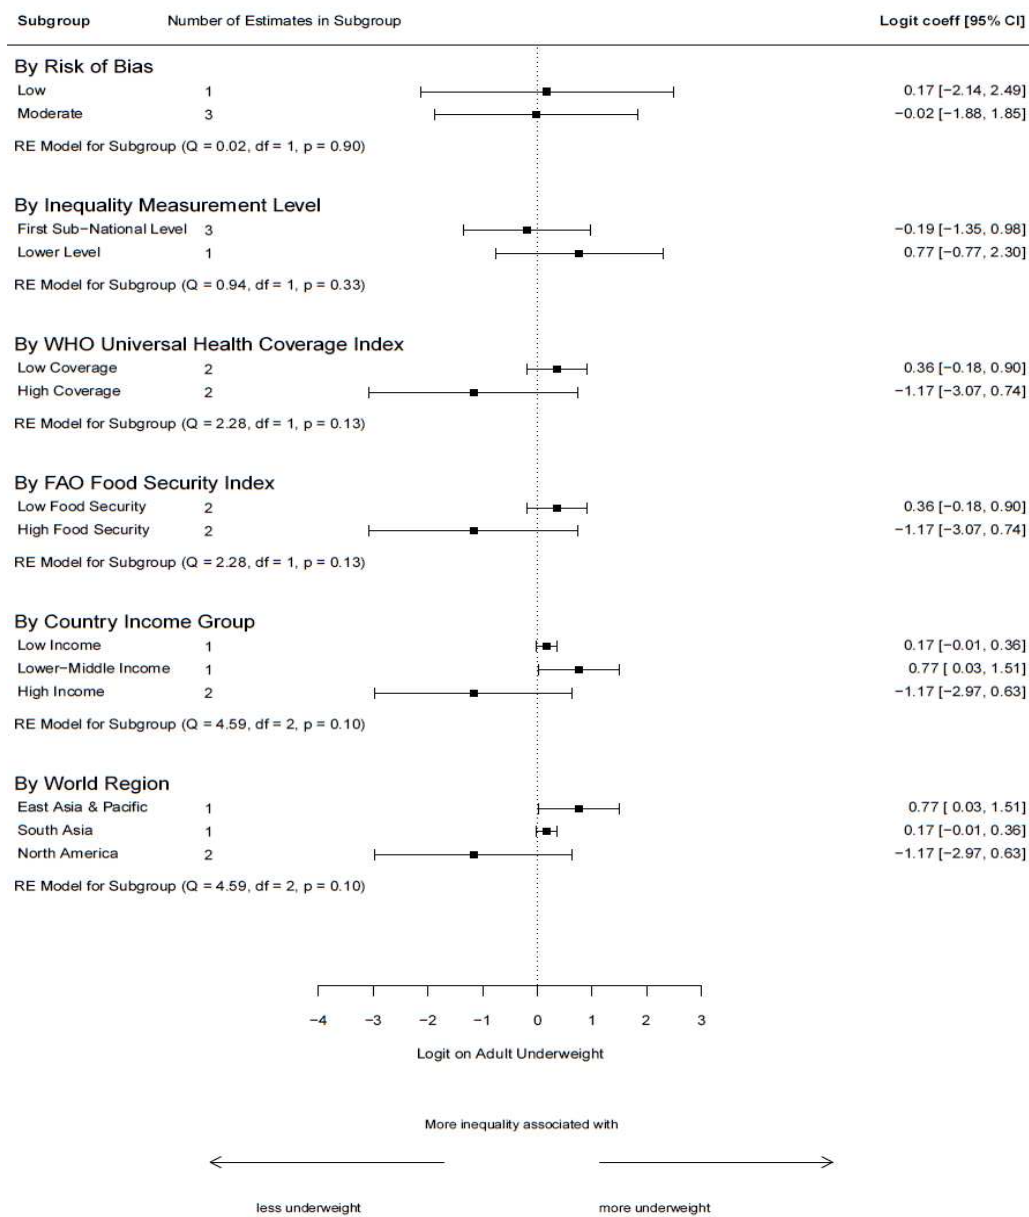

**Figure S8: Subgroup analysis for associations between Gini coefficients and adult underweight**

Logistic multilevel regression effects of Gini coefficient on a 0-1 scale on logged odds of malnutrition presented.



**Table S5: Eggers test on small-study effects for associations between Gini coefficients and nutrition outcomes**

|                          | Beta  | SE of Beta | Z     | P    |
|--------------------------|-------|------------|-------|------|
| Adult Underweight        | -0.62 | 0.82       | -0.75 | 0.45 |
| Adult Overweight/Obesity | -1.23 | 0.55       | -2.22 | 0.03 |



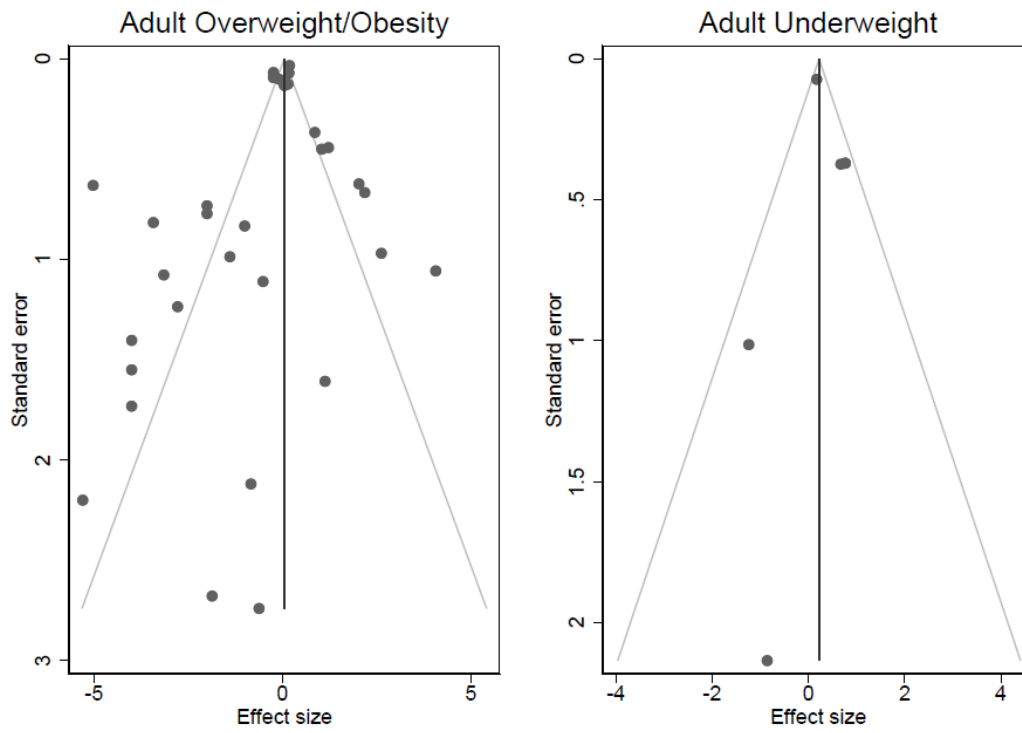

Figure S10: Funnel plots of studies on associations between Gini coefficients and nutrition outcomes
